# Supplementary material for: Modifying redox properties and local bonding of Co3O4 by CeO2 enhances oxygen evolution catalysis in acid
Source: PubMed Central journal article supplement (PMC8144612; doi:10.1038/s41467-021-23390-8), 2021-05-24
Supplement: 41467_2021_23390_MOESM2_ESM.pdf [file 41467_2021_23390_MOESM2_ESM.pdf]

**Modifying redox properties and local bonding of  $\text{Co}_3\text{O}_4$  by  $\text{CeO}_2$  enhances  
oxygen evolution catalysis in acid**

Jinzhen Huang<sup>1,2</sup>, Hongyuan Sheng<sup>1</sup>, R. Dominic Ross<sup>1</sup>, Jiecai Han<sup>2</sup>, Xianjie Wang<sup>3</sup>, Bo Song<sup>\*,2</sup>  
and Song Jin<sup>\*,1</sup>

<sup>1</sup>Department of Chemistry, University of Wisconsin–Madison, 1101 University Avenue, Madison,  
Wisconsin 53706, United States

<sup>2</sup>Center for Composite Materials and Structures, Harbin Institute of Technology, Harbin 150001,  
China

<sup>3</sup>Department of Physics, Harbin Institute of Technology, Harbin 150001, China

\*Correspondence to: jin@chem.wisc.edu (S. J.); songbo@hit.edu.cn (B. S.)

## Table of Contents

|                                                        |     |
|--------------------------------------------------------|-----|
| Supplementary Figure 1.....                            | S3  |
| Supplementary Figure 2.....                            | S4  |
| Supplementary Figure 3.....                            | S5  |
| Supplementary Figure 4.....                            | S6  |
| Supplementary Figure 5.....                            | S7  |
| Supplementary Figure 6.....                            | S8  |
| Supplementary Figure 7.....                            | S9  |
| Supplementary Figure 8.....                            | S10 |
| Supplementary Figure 9.....                            | S11 |
| Supplementary Figure 10.....                           | S12 |
| Supplementary Figure 11.....                           | S13 |
| Supplementary Figure 12.....                           | S14 |
| Supplementary Figure 13.....                           | S15 |
| Supplementary Figure 14.....                           | S16 |
| Supplementary Figure 15.....                           | S17 |
| Supplementary Figure 16.....                           | S18 |
| Supplementary Figure 17.....                           | S19 |
| Supplementary Figure 18.....                           | S20 |
| Supplementary Figure 19.....                           | S21 |
| Supplementary Figure 20.....                           | S22 |
| Supplementary Figure 21.....                           | S23 |
| Supplementary Figure 22.....                           | S24 |
| Supplementary Figure 23.....                           | S25 |
| Supplementary Figure 24.....                           | S26 |
| Supplementary Figure 25.....                           | S27 |
| Supplementary Figure 26.....                           | S28 |
| Supplementary Figure 27.....                           | S29 |
| Supplementary Figure 28.....                           | S30 |
| Supplementary Figure 29.....                           | S31 |
| Supplementary Figure 30.....                           | S32 |
| Supplementary Figure 31.....                           | S33 |
| Supplementary Table 1.....                             | S34 |
| Supplementary Table 2.....                             | S34 |
| Supplementary Table 3.....                             | S35 |
| References cited in the Supplementary Information..... | S36 |

## Supplementary Figures and Tables

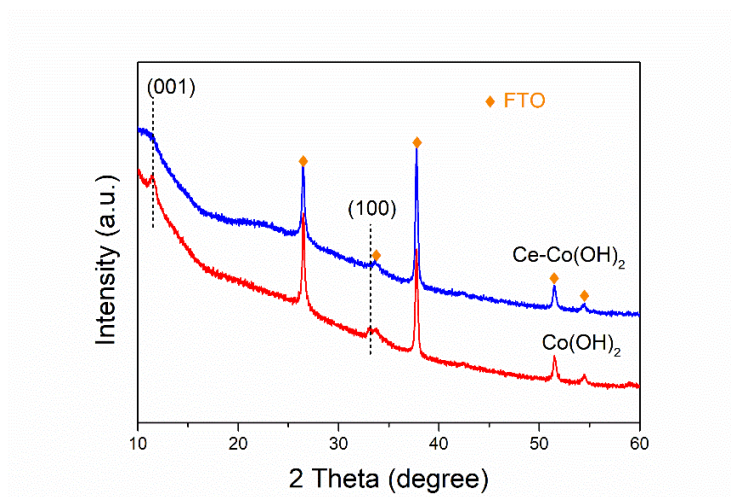

**Supplementary Figure 1.** PXRD patterns of  $\alpha$ -Co(OH)<sub>2</sub> and Ce-incorporated Co(OH)<sub>2</sub> [denoted as Ce-Co(OH)<sub>2</sub>] precursors electrodeposited on FTO substrates.

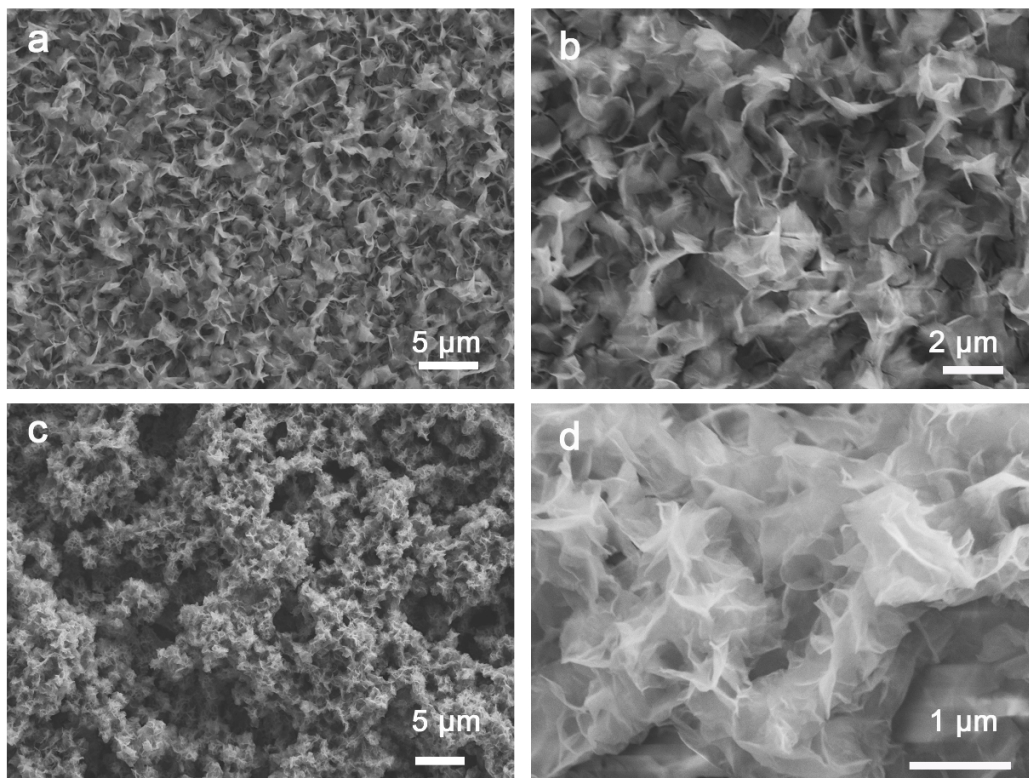

**Supplementary Figure 2.** Low- and high-magnification SEM images of (a,b)  $\text{Co}(\text{OH})_2$  and (c,d) Ce-incorporated  $\text{Co}(\text{OH})_2$  [denoted as  $\text{Ce-Co}(\text{OH})_2$ ] precursors electrodeposited on FTO substrates. The  $\text{Co}(\text{OH})_2$  nanosheets are more uniformly interconnected, while the  $\text{Ce-Co}(\text{OH})_2$  nanosheets are more aggregated with wrinkles.

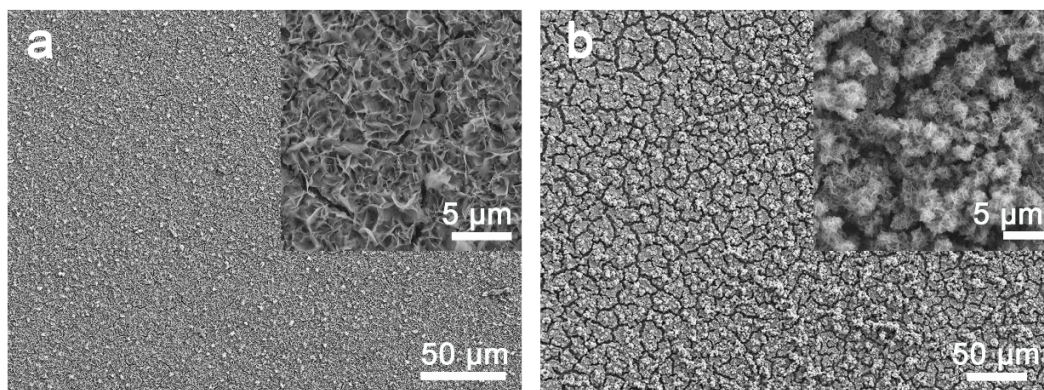

**Supplementary Figure 3.** Low- and high-magnification SEM images of (a) Co<sub>3</sub>O<sub>4</sub> nanostructures and (b) Co<sub>3</sub>O<sub>4</sub>/CeO<sub>2</sub> nanocomposites on FTO substrates made by annealing the metal hydroxide precursors shown in Supplementary Fig. 2. The annealing process introduced some cracks in both Co<sub>3</sub>O<sub>4</sub> and Co<sub>3</sub>O<sub>4</sub>/CeO<sub>2</sub> films, probably due to the shrinkage during the structural transformation from hydroxides to oxides.

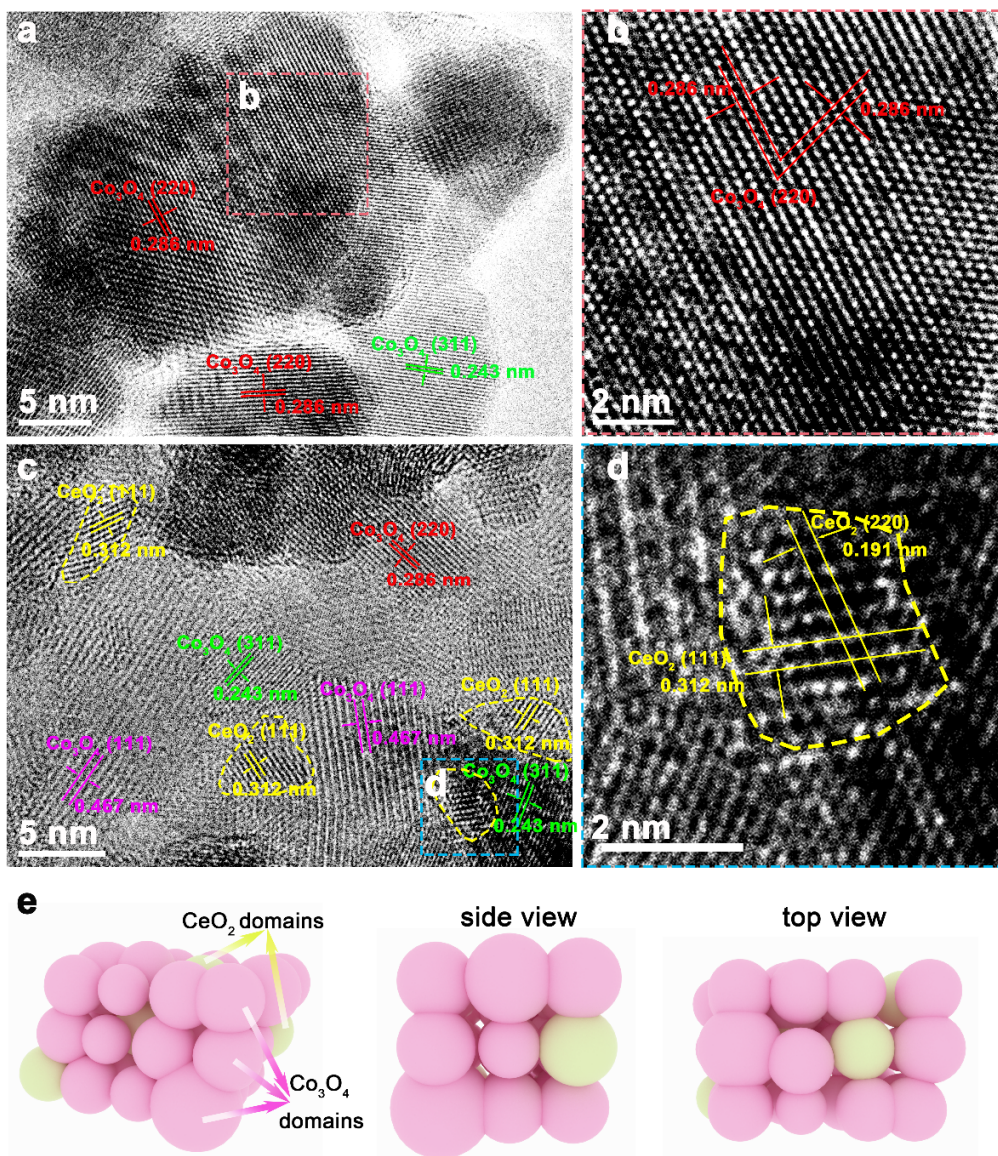

**Supplementary Figure 4.** HRTEM images of (a,b)  $\text{Co}_3\text{O}_4$  and (c,d)  $\text{Co}_3\text{O}_4/\text{CeO}_2$  catalysts (see Figure 1 a-d in the main text for reference). (b) and (d) are the enlarged images from the region in (a) and (c) highlighted by the dashed boxes, respectively. The  $\text{CeO}_2$  domains in (c) are all around 5 nm, which is consistent with calculated results from the PXRD patterns in Supplementary Figure 6. (e) The schematic illustration for the distribution of  $\text{CeO}_2$  domains in the  $\text{Co}_3\text{O}_4/\text{CeO}_2$  composite.

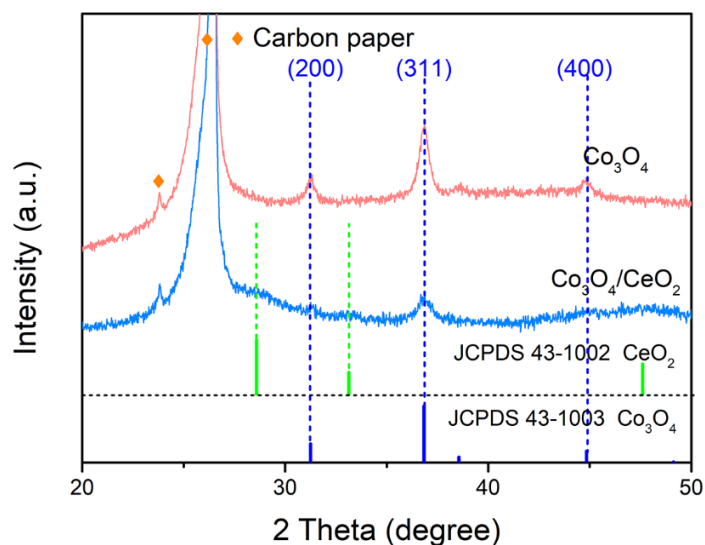

**Supplementary Figure 5.** PXRD patterns of  $\text{Co}_3\text{O}_4$  and  $\text{Co}_3\text{O}_4/\text{CeO}_2$  samples grown on carbon paper substrates by annealing at  $400\text{ }^\circ\text{C}$  for 2 h. Since one of the diffraction peaks of the FTO substrate is overlapped with the (311) diffraction peak of  $\text{Co}_3\text{O}_4$  (see Fig. 1e in the main text), we synthesized  $\text{Co}_3\text{O}_4$  and  $\text{Co}_3\text{O}_4/\text{CeO}_2$  samples on carbon paper substrates for the estimation of the average crystalline domain sizes using the Scherrer equation. These were also the catalyst samples grown on high surface area carbon paper electrodes that were electrochemically measured later (Supplementary Fig. 26, 29 and 30).

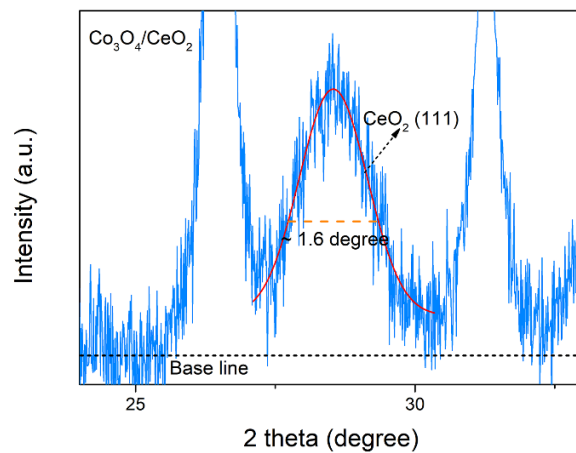

**Supplementary Figure 6.** The enlarged PXRD pattern of Co<sub>3</sub>O<sub>4</sub>/CeO<sub>2</sub> at around the CeO<sub>2</sub> (111) peak position. Scherrer analysis of this peak at a full width at half maximum of ~ 1.6 degree reveals the average crystal domain size of CeO<sub>2</sub> is around ~ 5 nm.



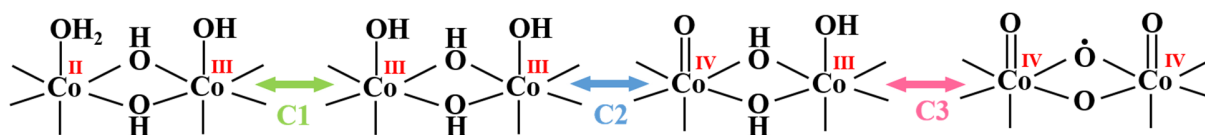

**Supplementary Figure 7.** Proposed structural motifs associated with the three sets of pre-OER redox features present in the  $\text{Co}_3\text{O}_4$  catalyst in acidic media that involve dimeric Co redox centers. The corresponding cathodic peaks at  $\sim 1.40$ ,  $\sim 1.50$  and  $\sim 1.63$  V vs. RHE are denoted as C1, C2, and C3, respectively (see Fig. 2b in the main text). Note that these proposed structural motifs of dimeric Co redox centers are one set of the possible configurations in acidic media, since most of the relevant literature focused on neutral and alkaline media<sup>1-5</sup>.

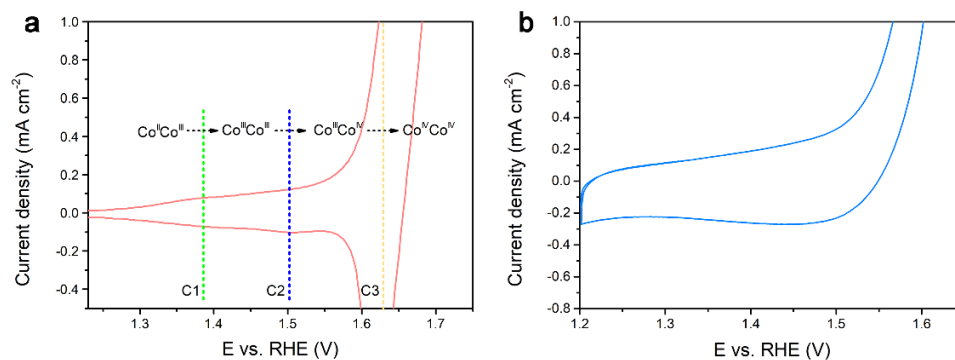

**Supplementary Figure 8.** Magnified CV curves of the (a)  $\text{Co}_3\text{O}_4$  and (b)  $\text{Co}_3\text{O}_4/\text{CeO}_2$ . The  $\text{Co}_3\text{O}_4/\text{CeO}_2$  nanocomposite catalyst that clearly shows no obvious pre-OER redox features (also see Fig. 2a in the main text for reference full range CV).

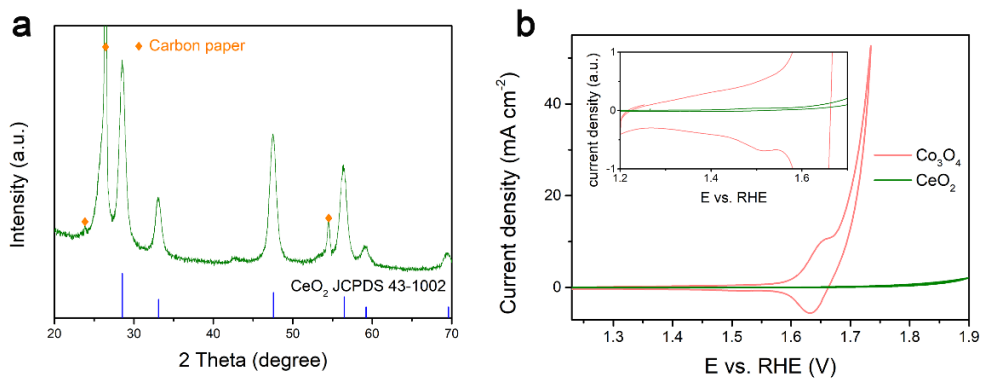

**Supplementary Figure 9.** (a) The XRD pattern for a CeO<sub>2</sub> sample on carbon paper (whose peaks are marked by orange dots) in comparison with the standard PXRD pattern (cubic, JCPDS 43-1002). (b) The CV curve of the CeO<sub>2</sub> sample compared to that of Co<sub>3</sub>O<sub>4</sub> on carbon paper in 0.5 M H<sub>2</sub>SO<sub>4</sub> solution. Inset in (b) is the enlarged image to see the redox features. Clearly, the CeO<sub>2</sub> sample show no obvious redox feature and very poor activity toward OER in acid.

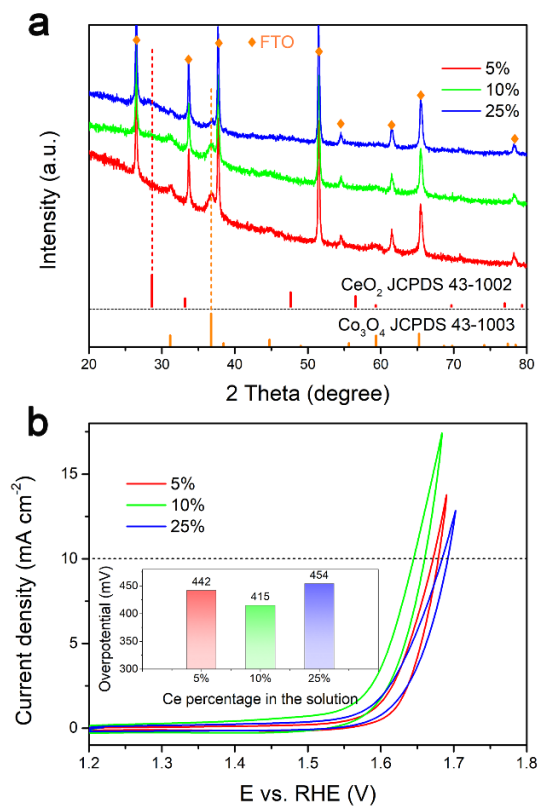

**Supplementary Figure 10.** (a) PXRD patterns of the series of Co<sub>3</sub>O<sub>4</sub>/CeO<sub>2</sub> catalysts on FTO electrodes prepared by introducing different nominal Ce metal contents (5, 10, and 25 mol%) during the electrodeposition process. (b) Comparisons of the acidic OER catalytic performances of the series of Co<sub>3</sub>O<sub>4</sub>/CeO<sub>2</sub> catalysts in 0.5 M H<sub>2</sub>SO<sub>4</sub> solution, the inset shows the overpotential required to achieve a geometric catalytic current density of 10 mA cm<sup>-2</sup> on each catalyst.

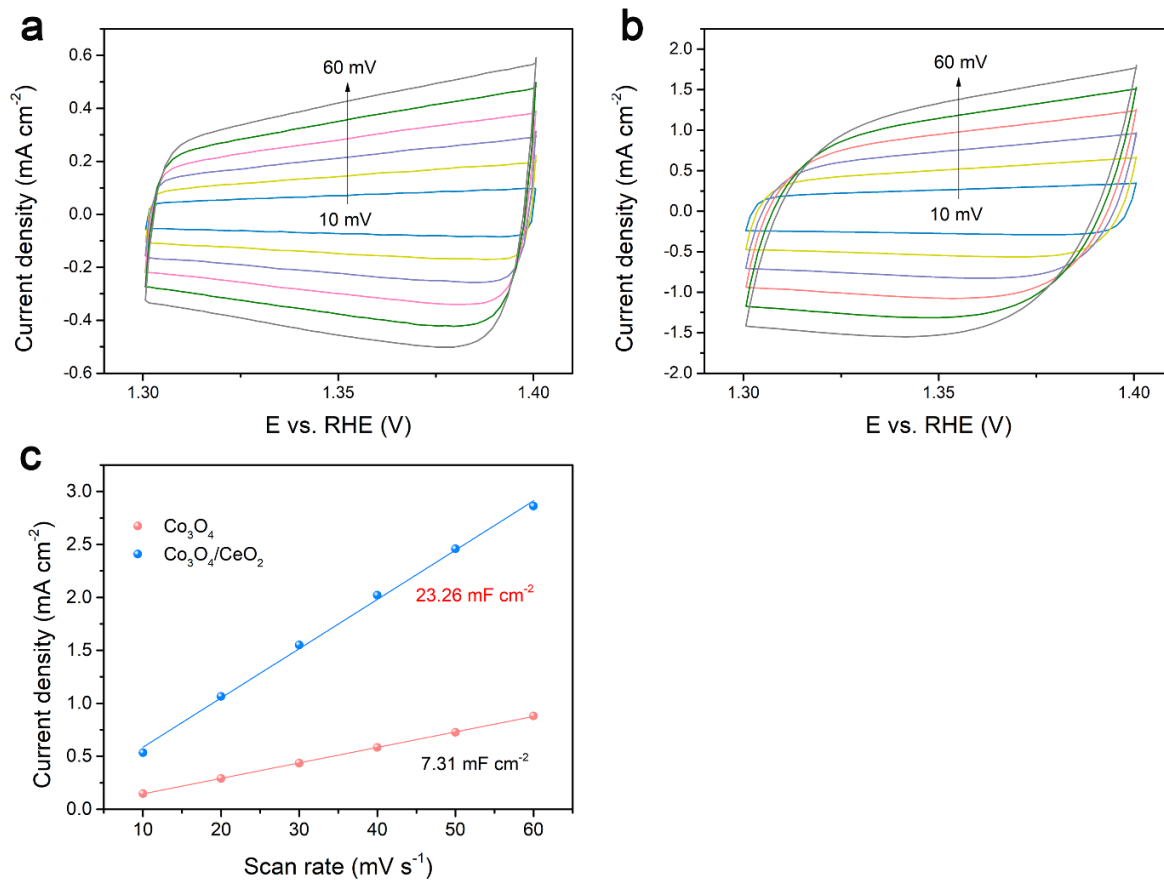

**Supplementary Figure 11.** CVs of (a) Co<sub>3</sub>O<sub>4</sub> and (b) Co<sub>3</sub>O<sub>4</sub>/CeO<sub>2</sub> catalysts on FTO electrodes in 0.5 M H<sub>2</sub>SO<sub>4</sub> solution recorded at different scan rates from 10 to 60 mV s<sup>-1</sup> in pre-OER potential region. (c) C<sub>dl</sub> values of both catalysts extracted from the plots of current density as a function of scan rate.

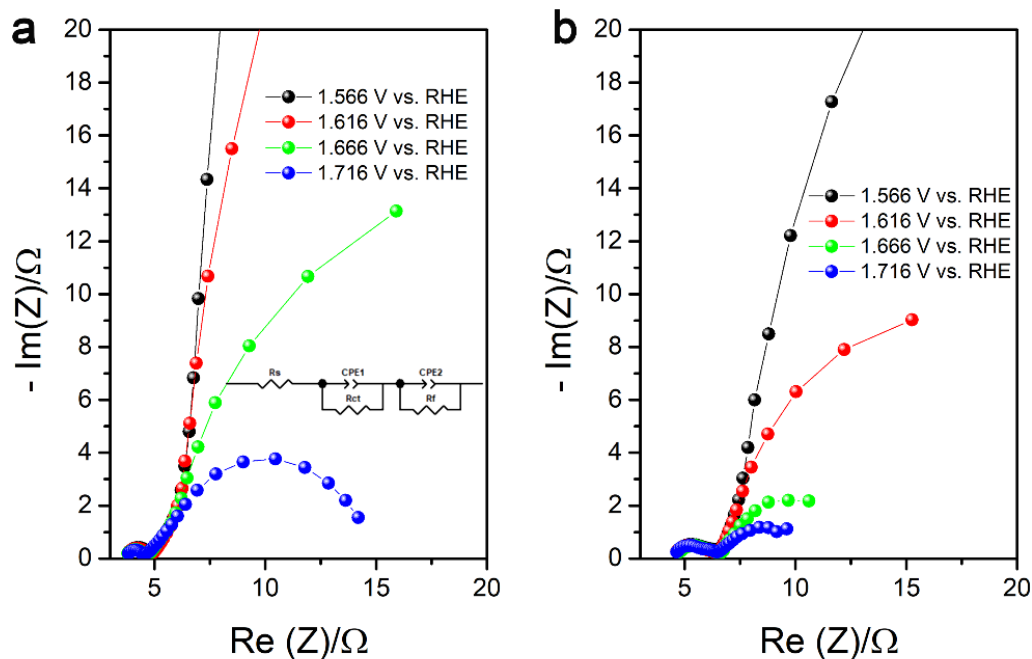

**Supplementary Figure 12.** The Nyquist plots of (a)  $\text{Co}_3\text{O}_4$  and (b)  $\text{Co}_3\text{O}_4/\text{CeO}_2$  catalysts on FTO electrodes recorded at different potentials in 0.5 M  $\text{H}_2\text{SO}_4$  solution. The inset of (a) shows the Voigt circuit model. Since there are two semicircles in these Nyquist plots, the Voigt circuit is used as the equivalent circuit model for EIS fitting to extract the uncompensated solution resistance ( $R_s$ ), the FTO/catalyst interface resistance ( $R_f$ ), and the charge transfer resistance ( $R_{ct}$ ) of the catalytic OER reaction. The  $R_{ct}$  values are summarized in Supplementary Table 2.

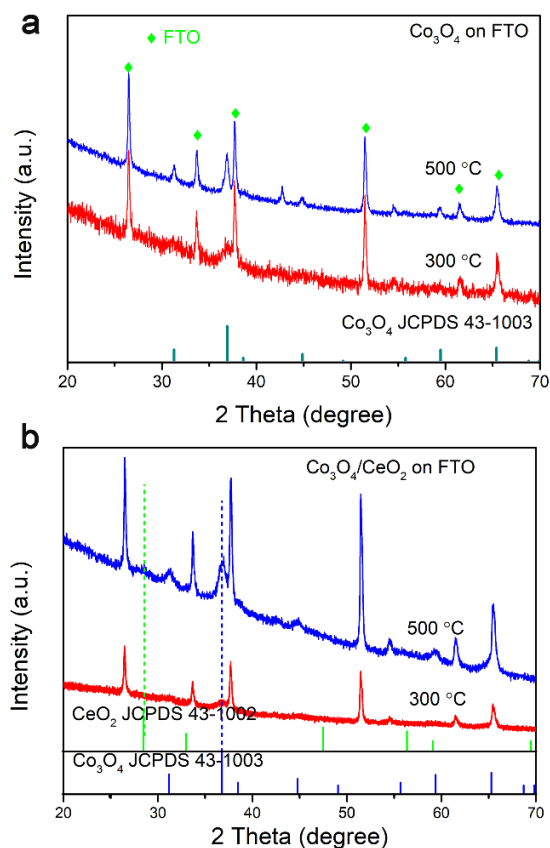

**Supplementary Figure 13.** PXRD patterns of the series of (a)  $\text{Co}_3\text{O}_4$  and (b)  $\text{Co}_3\text{O}_4/\text{CeO}_2$  catalysts on FTO electrodes prepared by annealing at different temperatures (300 vs. 500 °C) for 2 h. The samples annealed at 400 °C for 2 h are shown in Fig. 1e in the main text. The differences in diffraction peak widths clearly show that higher annealing temperatures resulted in higher degrees of crystallinity and larger crystalline domain sizes.

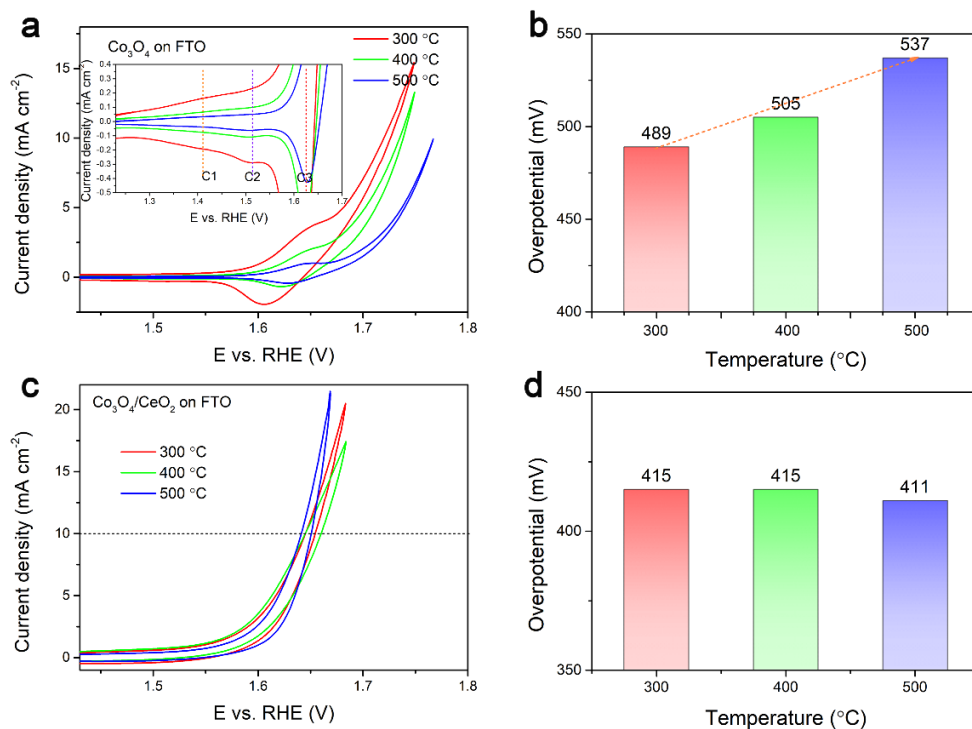

**Supplementary Figure 14.** Comparisons of the acidic OER catalytic performances of the series of (a) Co<sub>3</sub>O<sub>4</sub> and (c) Co<sub>3</sub>O<sub>4</sub>/CeO<sub>2</sub> catalysts on FTO electrodes prepared by annealing at different temperatures (300, 400, or 500 °C) for 2 h. All CVs were recorded in 0.5 M H<sub>2</sub>SO<sub>4</sub> solution. The inset of (a) shows the magnified CV curves of the Co<sub>3</sub>O<sub>4</sub> catalysts that highlight the pre-OER redox features. The corresponding overpotentials required to achieve a geometric catalytic current density of 10 mA cm<sup>-2</sup> on (b) Co<sub>3</sub>O<sub>4</sub> and (d) Co<sub>3</sub>O<sub>4</sub>/CeO<sub>2</sub> catalysts annealed at different temperatures. Low temperature (less crystalline) Co<sub>3</sub>O<sub>4</sub> catalyst had better catalytic performance; in contrast, the catalytic performance of Co<sub>3</sub>O<sub>4</sub>/CeO<sub>2</sub> nanocomposite catalysts was not sensitive to the annealing temperature (sample crystallinity).



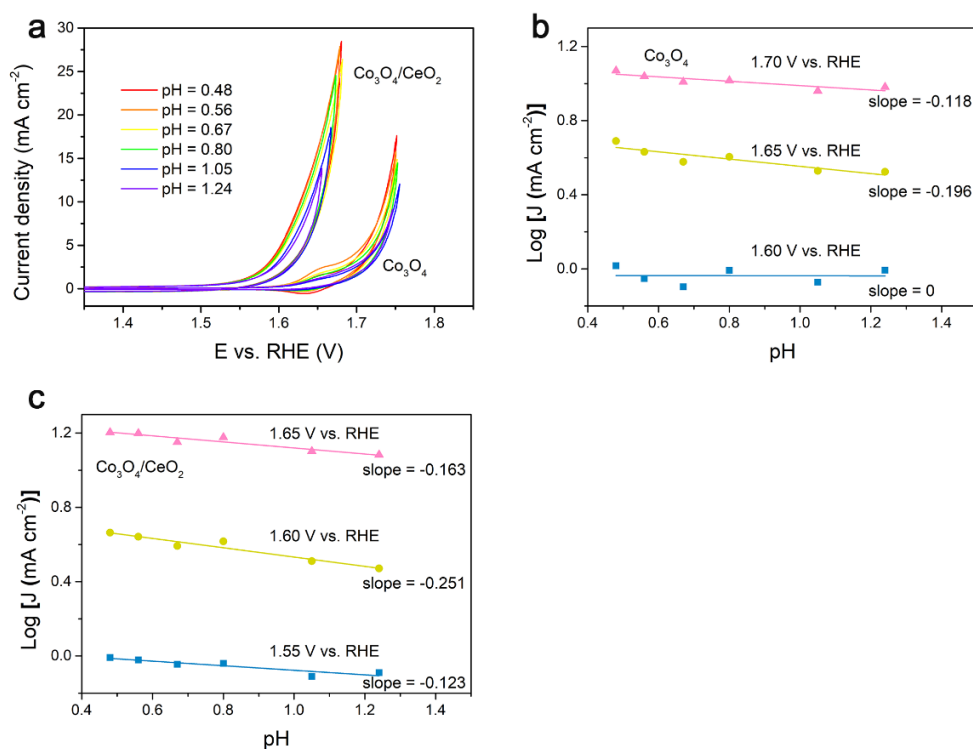

**Supplementary Figure 15.** (a) CV curves of both  $\text{Co}_3\text{O}_4$  and  $\text{Co}_3\text{O}_4/\text{CeO}_2$  catalysts on FTO electrodes recorded in  $\text{H}_2\text{SO}_4$  solutions with different pH values of 0.48 (red), 0.56 (orange), 0.67 (yellow), 0.80 (green), 1.05 (blue), and 1.24 (purple). The logarithm of the catalytic current densities of (b)  $\text{Co}_3\text{O}_4$  and (c)  $\text{Co}_3\text{O}_4/\text{CeO}_2$  catalysts plotted against the solution pH at fixed potentials vs. RHE. The extracted reaction order with respect to pH is close to zero on the RHE scale for the acidic OER on both catalysts, indicating the catalytic reaction is less affected by the concentration of proton in the electrolyte.

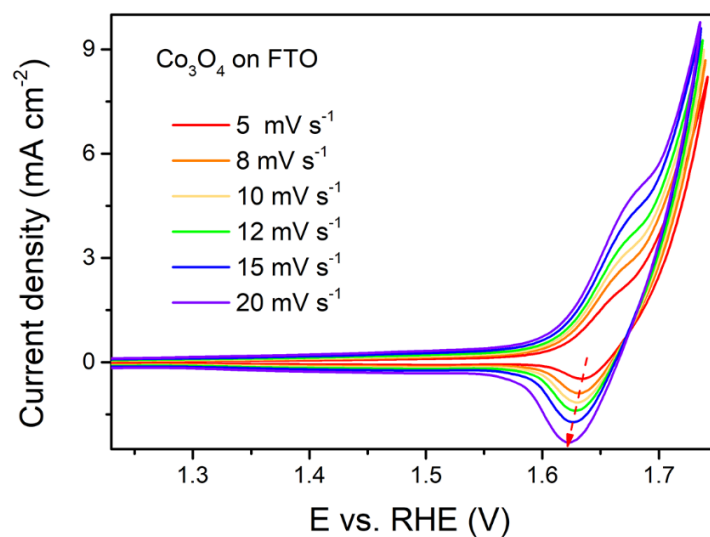

**Supplementary Figure 16.** CV curves of the Co<sub>3</sub>O<sub>4</sub> catalyst on FTO electrode recorded at different scan rates in 0.5 M H<sub>2</sub>SO<sub>4</sub> solution. Given the power law relationship between the cathodic peak current density ( $j_c$ ) and the scan rate ( $\nu$ )<sup>6,7</sup>:  $j_c = a\nu^b$ . The logarithm of the current densities of the three pre-OER cathodic peaks (denoted as C1, C2 and C3 in order of increasing potential) were plotted against the logarithm of the scan rates to extract the exponent  $b$  value of each redox process. In the two limiting cases: (i)  $b = 0.5$  when it is a diffusion-controlled redox process; (ii)  $b = 1$  when it is a perfectly non-diffusion-controlled capacitive behavior. The extracted exponent  $b$  values of C1, C2 and C3 peaks are  $1.058 \pm 0.022$ ,  $0.967 \pm 0.007$  and  $1.122 \pm 0.044$ , respectively, as shown in the inset of Fig. 3b in the main text. These exponent  $b$  values indicate all of these pre-OER redox features are surface capacitive processes.

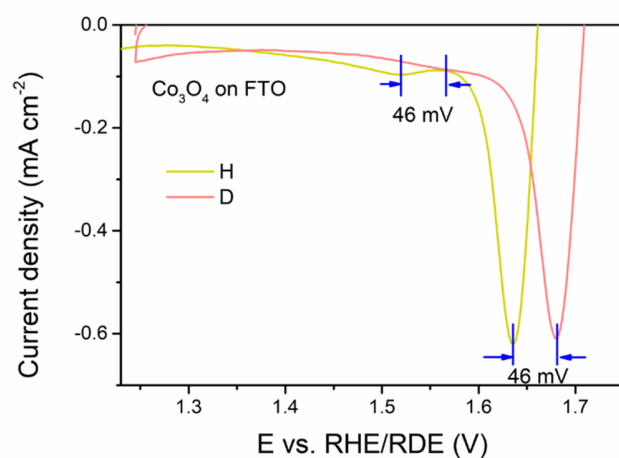

**Supplementary Figure 17.** Magnified CV curves of the  $\text{Co}_3\text{O}_4$  catalyst on FTO electrode recorded in 0.5 M  $\text{H}_2\text{SO}_4$  in  $\text{H}_2\text{O}$  solution on the RHE scale (yellow) vs. in 0.5 M  $\text{D}_2\text{SO}_4$  in  $\text{D}_2\text{O}$  solution on the RDE scale (orange). A similar shift of  $\sim 46$  mV was observed in the peak potentials of both C2 and C3 peaks in the protonic vs. deuteric solution, which is likely induced by the equilibrium isotope effect (EIE) associated with the redox processes of Co redox centers in  $\text{Co}_3\text{O}_4$  sample<sup>3</sup>.

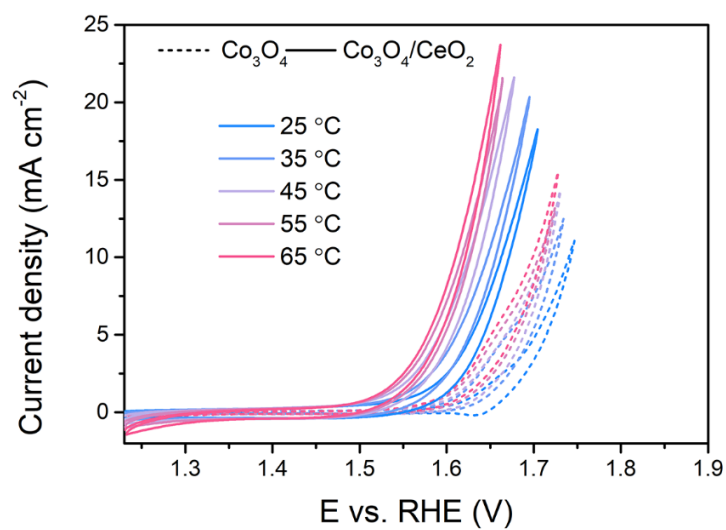

**Supplementary Figure 18.** CV curves of Co<sub>3</sub>O<sub>4</sub> (dashed) and Co<sub>3</sub>O<sub>4</sub>/CeO<sub>2</sub> (solid) catalysts on FTO electrodes recorded in 0.5 M H<sub>2</sub>SO<sub>4</sub> solution at different temperatures. These CV results were used to calculate the apparent activation energy ( $E_{app}$ ) and the pre-exponential factor ( $A_{app}$ ) for both catalysts, as shown in Figure 3f Supplementary Fig. 20a.

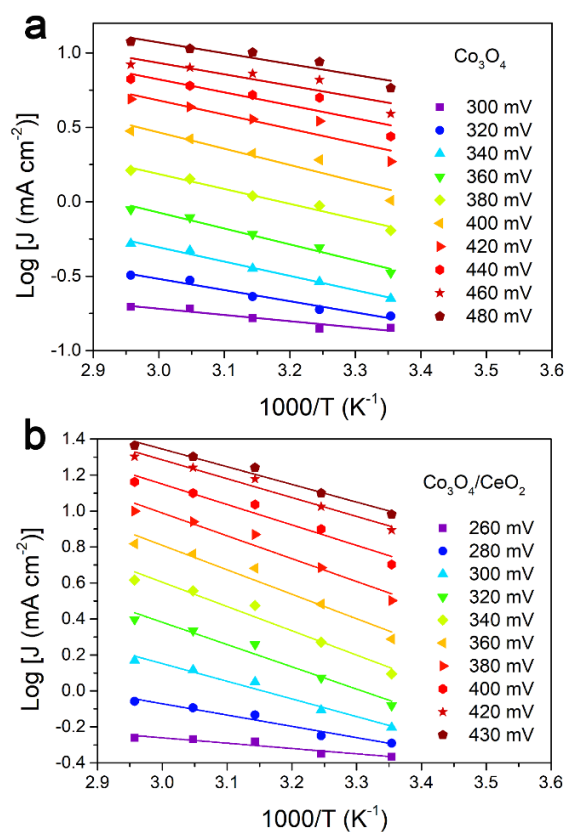

**Supplementary Figure 19.** The logarithm of the catalytic current density plotted against 1000 times the reciprocal of the temperature (in Kelvin) to extract the apparent activation energy ( $E_{\text{app}}$ ) and the pre-exponential factor ( $A_{\text{app}}$ ) of the acidic OER on (a)  $\text{Co}_3\text{O}_4$  and (b)  $\text{Co}_3\text{O}_4/\text{CeO}_2$  catalysts at fixed overpotentials using the Arrhenius plots (Equation 11 in Methods). The extracted  $E_{\text{app}}$  values are shown in Fig. 3f in the main text and the pre-exponential factors ( $A_{\text{app}}$ ) are shown in Supplementary Fig. 20a.

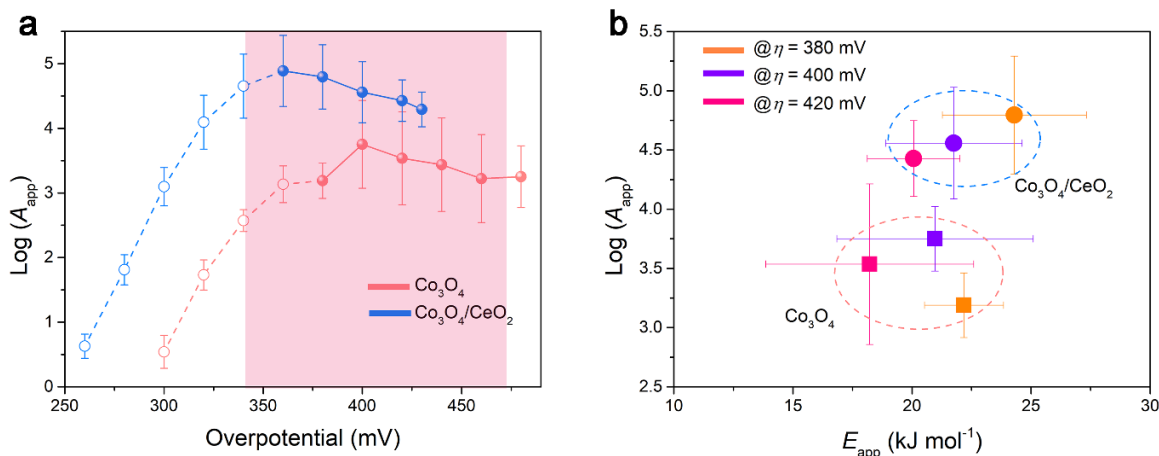

**Supplementary Figure 20.** (a) The logarithm of pre-exponential factor  $A_{\text{app}}$  derived from the intercept during the extraction of  $E_{\text{app}}$  for  $\text{Co}_3\text{O}_4$  and  $\text{Co}_3\text{O}_4/\text{CeO}_2$  catalysts at fixed overpotentials using the Arrhenius plots, as shown in Supplementary Fig. 19. (b) The logarithm of pre-exponential factor  $A_{\text{app}}$  plotted against  $E_{\text{app}}$  (at three representative overpotentials) to differentiate the major difference between  $\text{Co}_3\text{O}_4$  and  $\text{Co}_3\text{O}_4/\text{CeO}_2$ . The error bar represents the standard error from fitting.

Generally speaking,  $E_{\text{app}}$  reflects the modification in enthalpy of activation and formation of intermediates, while  $A_{\text{app}}$  is often altered by changing the concentration of active sites or entropy of activation (the number of active intermediates that enter the rate determining step). A lower  $E_{\text{app}}$  and higher  $A_{\text{app}}$  will both lead to better catalytic performance<sup>8,9</sup>. Combining the smaller Tafel slope and higher intrinsic activity even after ECSA-normalization in  $\text{Co}_3\text{O}_4/\text{CeO}_2$ , it is quite likely that the introduction of  $\text{CeO}_2$  alters the entropy of activation for  $\text{Co}_3\text{O}_4$  since higher  $A_{\text{app}}$  values were consistently observed in  $\text{Co}_3\text{O}_4/\text{CeO}_2$  nanocomposite. In contrast, the differences in the  $E_{\text{app}}$  values between  $\text{Co}_3\text{O}_4$  and  $\text{Co}_3\text{O}_4/\text{CeO}_2$  nanocomposite catalysts are less significant and consistent.

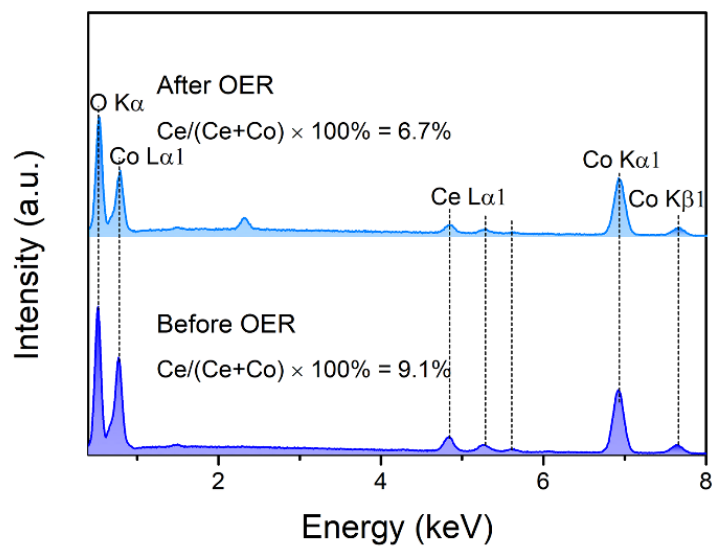

**Supplementary Figure 21.** SEM-EDS spectra of the  $\text{Co}_3\text{O}_4/\text{CeO}_2$  catalyst before and after OER testing in 0.5 M  $\text{H}_2\text{SO}_4$  solution.

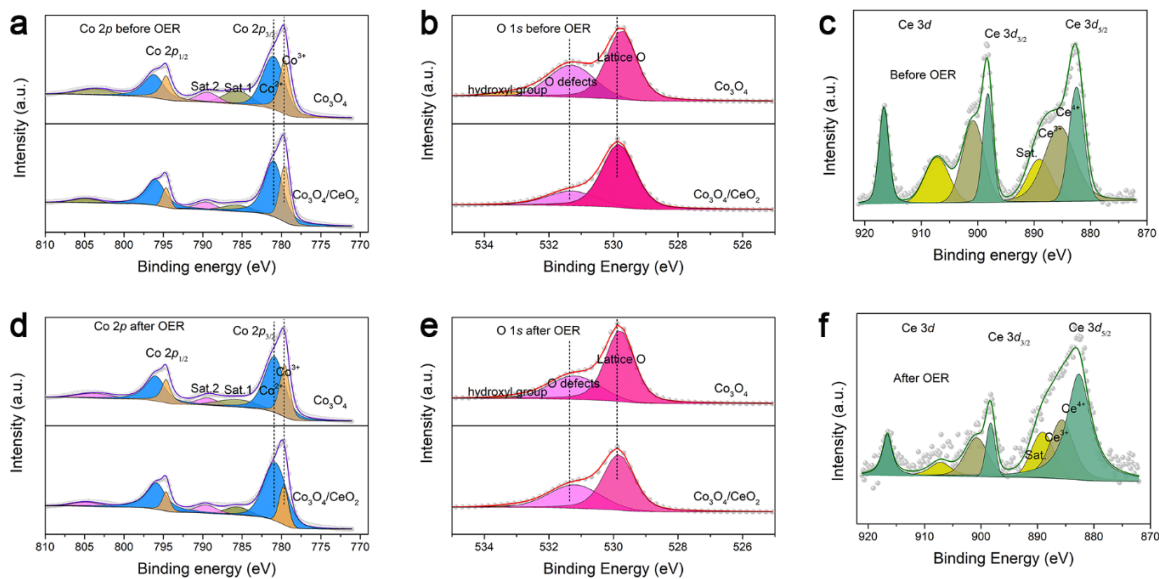

**Supplementary Figure 22.** High-resolution (a) Co 2*p*, (b) O 1*s* and (c) Ce 3*d* XPS spectra of Co<sub>3</sub>O<sub>4</sub> and Co<sub>3</sub>O<sub>4</sub>/CeO<sub>2</sub> catalysts on FTO electrodes (a–c) before and (d–f) after OER testing in 0.5 M H<sub>2</sub>SO<sub>4</sub> solution. Due to the spin-orbit coupling effect, the Co 2*p* signals are split into two dominant peaks, namely Co 2*p*<sub>3/2</sub> and Co 2*p*<sub>1/2</sub> (Supplementary Fig.22a,d). The Co 2*p*<sub>3/2</sub> peak can be fitted into Co<sup>3+</sup> and Co<sup>2+</sup> components at the binding energy of 779.6 and 781.4 eV, respectively<sup>10</sup>. No obvious shift in the binding energies of the Co 2*p* signals is observed after the introduction of CeO<sub>2</sub>. According to the XPS fitting results, Co<sub>3</sub>O<sub>4</sub>/CeO<sub>2</sub> exhibits a higher Co<sup>2+</sup>/Co<sup>3+</sup> ratio of 2.19 compared to Co<sub>3</sub>O<sub>4</sub> (1.70), which is consistent with other reported Co<sub>3</sub>O<sub>4</sub>/CeO<sub>2</sub> nanocomposites<sup>10–12</sup>. The O 1*s* signal can be deconvoluted into three different oxygen species, namely the lattice oxygen that binds to metal (529.8 eV), the undercoordinated oxygen defect (531.4 eV), and the adsorbed hydroxyl or H<sub>2</sub>O on the surface (533.0 eV) (Supplementary Fig. 22b,e). The Ce 3*d* signal of Co<sub>3</sub>O<sub>4</sub>/CeO<sub>2</sub> shows the co-existence of Ce<sup>3+</sup> and Ce<sup>4+</sup> (Supplementary Fig. 22c,f).



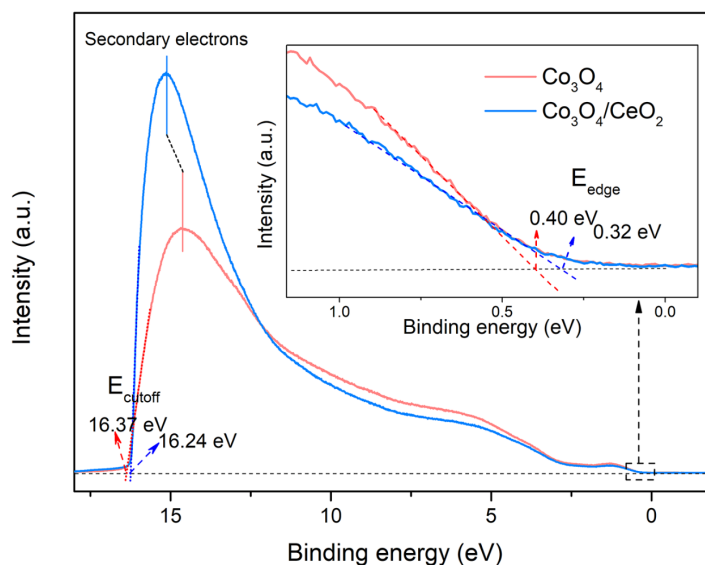

**Supplementary Figure 23.** The UPS spectra of  $\text{Co}_3\text{O}_4$  and  $\text{Co}_3\text{O}_4/\text{CeO}_2$  on FTO, the inset shows the enlarged spectra near the Fermi edge to highlight the difference at the valence band edge ( $E_{\text{edge}}$ ).

Besides the variations in the intensity of UPS spectra, the differences between  $\text{Co}_3\text{O}_4$  and  $\text{Co}_3\text{O}_4/\text{CeO}_2$  are also observed in the cutoff energy ( $E_{\text{cutoff}}$ ) for the secondary electrons and at the valence band edge ( $E_{\text{edge}}$ , reflecting the difference between the Fermi level and the valence band maximum). The work function ( $\Phi = h\nu - E_{\text{cutoff}}$ <sup>13,14</sup>, where  $h\nu$  is 21.22 eV for the excitation energy of the He I source) of  $\text{Co}_3\text{O}_4$  and  $\text{Co}_3\text{O}_4/\text{CeO}_2$  can be determined to be 4.85 and 4.98 eV, with the corresponding valence band energy [ $E_{\text{VB}} = -(\Phi + E_{\text{edge}})$  vs. vacuum<sup>13,14</sup>] of  $-5.25$  and  $-5.20$  eV, respectively. The work function of  $\text{CeO}_2$  was calculated to be 5.287 eV according to the literature<sup>15</sup>. Thus, the slightly modified work function of  $\text{Co}_3\text{O}_4/\text{CeO}_2$  compared to  $\text{Co}_3\text{O}_4$  can result from the charge redistribution between  $\text{Co}_3\text{O}_4$  and  $\text{CeO}_2$  to reach the equilibrium state. The charge redistribution across the  $\text{Co}_3\text{O}_4/\text{CeO}_2$  nanocomposite interface can also be reflected by the higher average Co valence state and shorter Co-O bond distance from XAS results (Figure 4). The similar phenomenon has also been reported by Liu et al previously<sup>12</sup>. These results suggest possible electronic interactions in  $\text{Co}_3\text{O}_4/\text{CeO}_2$  nanocomposite.

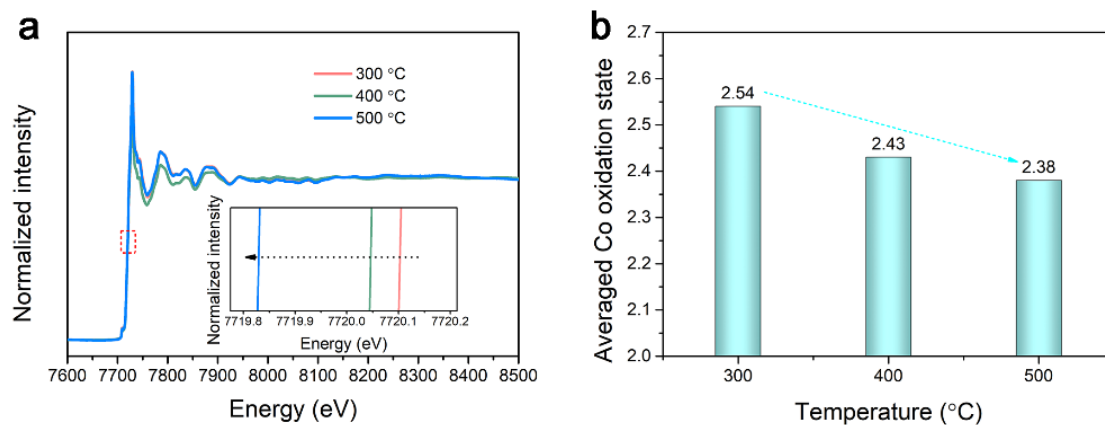

**Supplementary Figure 24.** Co K-edge XANES spectra of the as-synthesized  $\text{Co}_3\text{O}_4$  catalysts annealed at 300, 400 and 500 °C. (b) Comparisons of the average Co valence states of the as-synthesized  $\text{Co}_3\text{O}_4$  catalysts annealed at different temperatures.

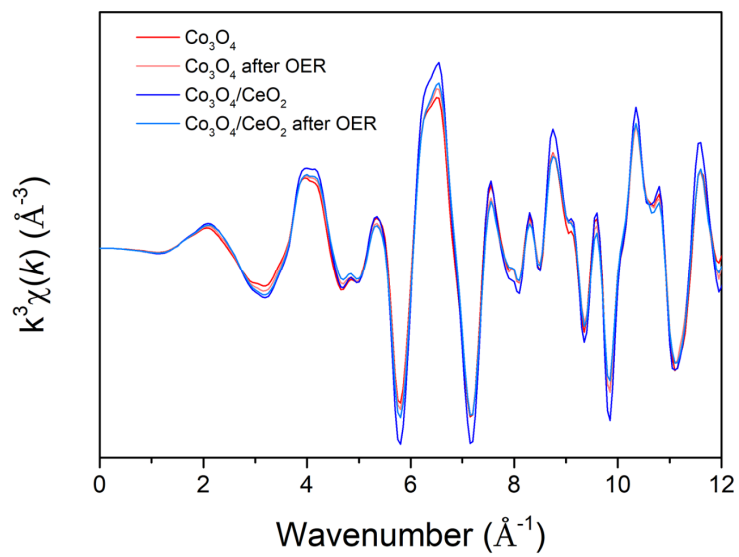

**Supplementary Figure 25.**  $k^3\chi(k)$  functions of Co K-edge EXAFS spectra of  $\text{Co}_3\text{O}_4$  and  $\text{Co}_3\text{O}_4/\text{CeO}_2$  catalysts before and after OER testing in 0.5 M  $\text{H}_2\text{SO}_4$  solution.

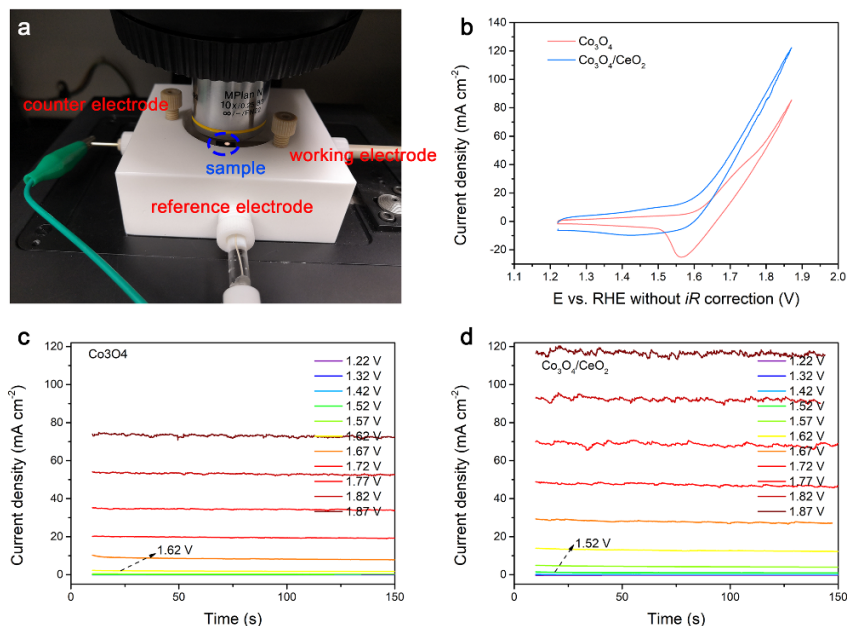

**Supplementary Figure 26.** (a) The experimental setup for in situ Raman measurements. (b) The CV curves of Co<sub>3</sub>O<sub>4</sub> and Co<sub>3</sub>O<sub>4</sub>/CeO<sub>2</sub> catalysts on carbon paper electrodes collected at the scan rate of 20 mV s<sup>-1</sup> in 0.5 M H<sub>2</sub>SO<sub>4</sub> using the in situ Raman cell. (c,d) The chronoamperometry curves of (c) Co<sub>3</sub>O<sub>4</sub> and (d) Co<sub>3</sub>O<sub>4</sub>/CeO<sub>2</sub> collected at various constant potentials (vs. RHE) during the in situ Raman measurements.

The Raman spectra were collected at various constant potentials without *iR* correction (increased from 1.22 V to 1.87 V vs. RHE and finally switched back to 1.22 V vs. RHE). Co<sub>3</sub>O<sub>4</sub> showed the characteristic Co<sup>III</sup>Co<sup>IV</sup> ↔ Co<sup>IV</sup>Co<sup>IV</sup> redox feature and the poorer OER performance than Co<sub>3</sub>O<sub>4</sub>/CeO<sub>2</sub> (Supplementary Figure 26b). The catalytic OER current on Co<sub>3</sub>O<sub>4</sub> and Co<sub>3</sub>O<sub>4</sub>/CeO<sub>2</sub> was not obviously detected until 1.62 V and 1.52 V vs. RHE, respectively, suggesting the OER onset potential of Co<sub>3</sub>O<sub>4</sub>/CeO<sub>2</sub> was ~ 100 mV lower than that of Co<sub>3</sub>O<sub>4</sub>.

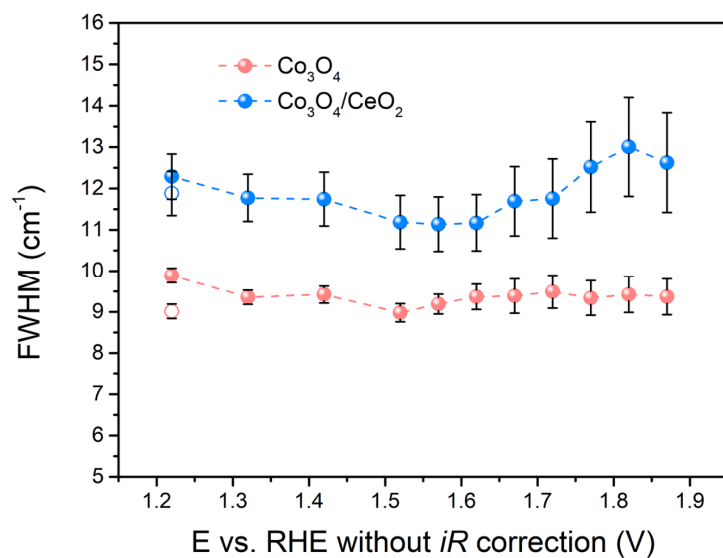

**Supplementary Figure 27.** The FWHM of the Raman  $A_{1g}$  peaks of  $\text{Co}_3\text{O}_4$  and  $\text{Co}_3\text{O}_4/\text{CeO}_2$  plotted against the applied potential show relatively small variations. The open symbols represent the data collected at 1.22 V after applying high potential (see Figure 5 in the main text for reference). Larger FWHM suggests smaller crystallites in  $\text{Co}_3\text{O}_4/\text{CeO}_2$ , which is consistent with the XRD (Supplementary Figure 5) and HRTEM (Figure 1c,d in the main text) results. The error bar represents the error from fitting.

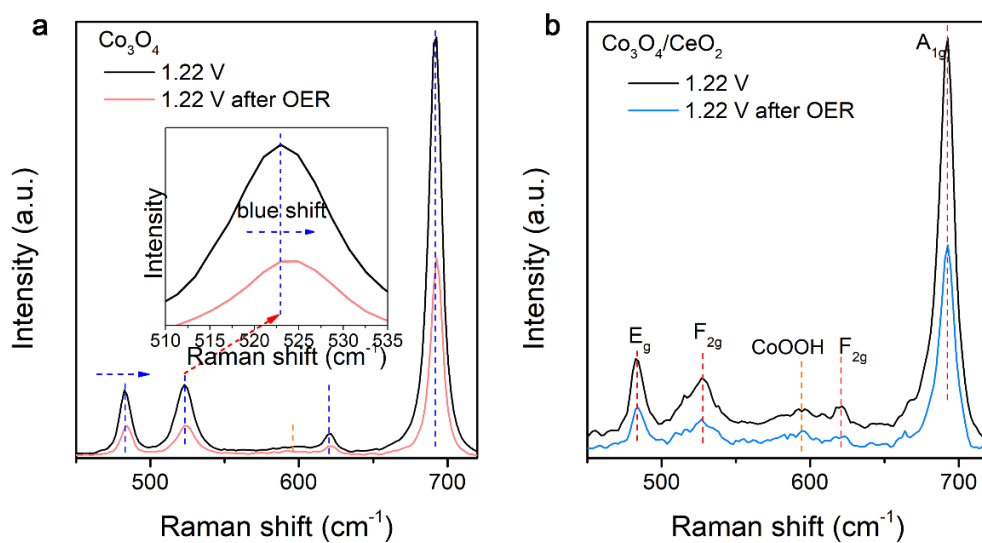

**Supplementary Figure 28.** The in situ Raman spectra of (a)  $\text{Co}_3\text{O}_4$  and (b)  $\text{Co}_3\text{O}_4/\text{CeO}_2$  collected at the 1.22 V vs. RHE before and after applying the higher potential sequence in the OER region up to 1.87 V vs. RHE (see Figure 5a in the main text for reference).

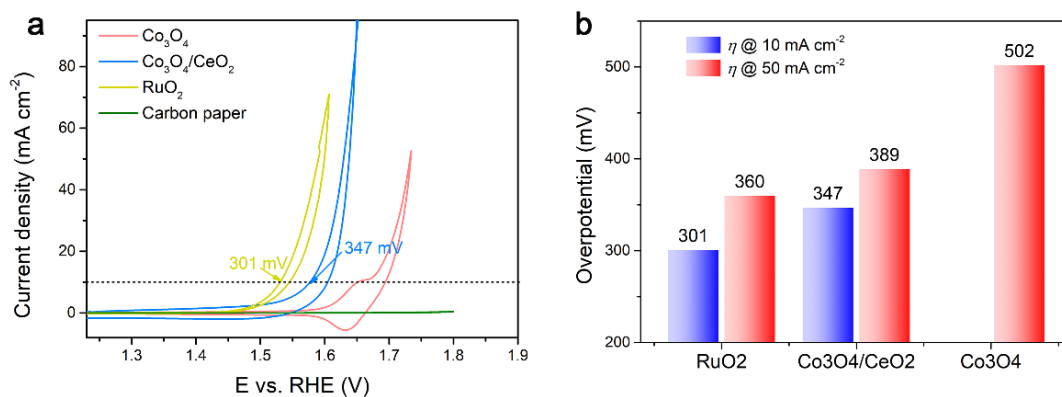

**Supplementary Figure 29.** (a) CV curves of Co<sub>3</sub>O<sub>4</sub> and Co<sub>3</sub>O<sub>4</sub>/CeO<sub>2</sub> catalysts on carbon paper electrodes recorded in 0.5 M H<sub>2</sub>SO<sub>4</sub> solution, in comparison with the bare carbon paper electrode and the benchmark RuO<sub>2</sub> catalyst on carbon paper electrode. (b) Comparisons of the overpotential required for each catalyst to reach a geometric current density of 10 and/or 50 mA cm<sup>-2</sup> on carbon paper electrode. The PXRD patterns for the Co<sub>3</sub>O<sub>4</sub> and Co<sub>3</sub>O<sub>4</sub>/CeO<sub>2</sub> catalysts on carbon paper electrodes are shown in Supplementary Fig. 5.

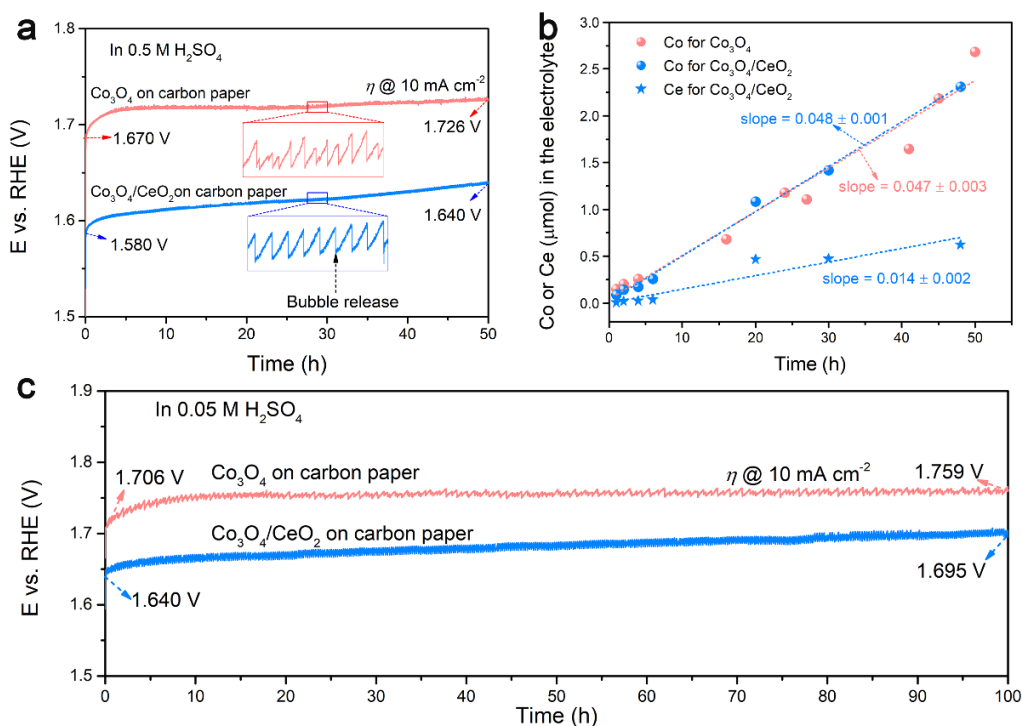

**Supplementary Figure 30.** Long-term chronopotentiometry tests of Co<sub>3</sub>O<sub>4</sub> and Co<sub>3</sub>O<sub>4</sub>/CeO<sub>2</sub> catalysts on carbon paper electrodes. (a) Chronopotentiometry curves of both catalysts held at a constant geometric catalytic current density of 10 mA cm<sup>-2</sup> in 0.5 M H<sub>2</sub>SO<sub>4</sub> solution over 50 h. The insets show the magnified curves within the time window of 28 to 30 h revealing some small fluctuations of current electrode potentials likely due to the accumulation and release of oxygen gas bubbles. (b) The corresponding cobalt and/or cerium dissolution rates of both catalysts measured by ICP-MS during the chronopotentiometry tests in 0.5 M H<sub>2</sub>SO<sub>4</sub> solution shown in (a). (c) Chronopotentiometry curves of both catalysts at 10 mA cm<sup>-2</sup> in a less concentrated 0.05 M H<sub>2</sub>SO<sub>4</sub> solution over 100 h.

Note that the high-performance carbon paper electrodes were used to better compare the stability of Co<sub>3</sub>O<sub>4</sub> vs. Co<sub>3</sub>O<sub>4</sub>/CeO<sub>2</sub> using a chronopotentiometry method. The stability tests were first conducted in 0.5 M H<sub>2</sub>SO<sub>4</sub> solution for 50 h at a constant current density of 10 mA cm<sup>-2</sup> (Supplementary Fig. 30a). The potential increase over time on the two catalysts were comparable (a 56 and 60 mV increase over 50 h in the case of Co<sub>3</sub>O<sub>4</sub> and Co<sub>3</sub>O<sub>4</sub>/CeO<sub>2</sub>, respectively). The dissolution rates of metal ions were monitored by collecting the electrolyte solution at different time points and performing ICP-MS analysis, as shown in Supplementary Fig. 30b. The cobalt dissolution rates of both catalysts followed almost the same linear trend ( $\sim 0.047$  and  $0.048 \mu\text{mol h}^{-1}$  in the case of Co<sub>3</sub>O<sub>4</sub> and Co<sub>3</sub>O<sub>4</sub>/CeO<sub>2</sub>, respectively), suggesting the dissolution rate of Co in both catalysts on carbon paper are  $\sim 50 \text{ ng min}^{-1}$ , which is a little lower than the  $100 \text{ ng min}^{-1}$  reported for Co<sub>3</sub>O<sub>4</sub> on FTO under the same testing condition<sup>16</sup>. The stability tests were further performed in a less concentrated 0.05 M H<sub>2</sub>SO<sub>4</sub> solution for a longer time period of 100 h, again showing very similar rates of potential increase over time on the two catalysts (53 and 55 mV



increase over 100 h in the case of  $\text{Co}_3\text{O}_4$  and  $\text{Co}_3\text{O}_4/\text{CeO}_2$ , respectively) (Supplementary Fig. 30c).

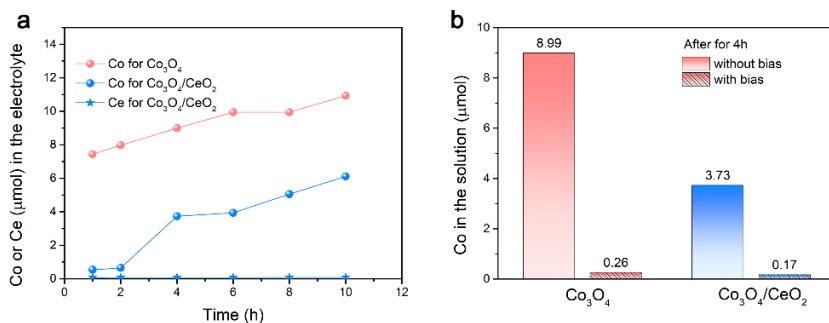

**Supplementary Figure 31.** (a) The metal dissolution rates of  $\text{Co}_3\text{O}_4$  and  $\text{Co}_3\text{O}_4/\text{CeO}_2$  catalysts without a bias. (b) The comparison of the amount of Co ions in the electrolyte solutions leached from both  $\text{Co}_3\text{O}_4$  and  $\text{Co}_3\text{O}_4/\text{CeO}_2$  catalysts after 4 h with or without a bias.

**Supplementary Table 1.** The bulk and surface percentage Ce metal contents in the  $\text{Co}_3\text{O}_4/\text{CeO}_2$  catalyst [defined as  $\text{Ce}/(\text{Ce} + \text{Co}) \times 100\%$ ] determined by SEM-EDS and XPS, respectively, before and after OER testing in 0.5 M  $\text{H}_2\text{SO}_4$  solution.

|            | SEM-EDS | XPS |
|------------|---------|-----|
| Before OER | 9.1     | 6.6 |
| After OER  | 6.7     | 2.0 |

**Supplementary Table 2.** The extracted  $R_{\text{ct}}$  values of the catalytic OER on both  $\text{Co}_3\text{O}_4$  and  $\text{Co}_3\text{O}_4/\text{CeO}_2$  catalysts on FTO electrodes at different potentials (V vs. RHE) in 0.5 M  $\text{H}_2\text{SO}_4$  solution.

|       | $\text{Co}_3\text{O}_4$ ( $\Omega$ ) | $\text{Co}_3\text{O}_4/\text{CeO}_2$ ( $\Omega$ ) |
|-------|--------------------------------------|---------------------------------------------------|
| 1.566 | 1100                                 | 129.0                                             |
| 1.616 | 231.9                                | 25.2                                              |
| 1.666 | 52.9                                 | 6.8                                               |
| 1.716 | 10.5                                 | 4.3                                               |

**Supplementary Table 3.** Comparisons of the catalytic performances of Co<sub>3</sub>O<sub>4</sub>/CeO<sub>2</sub> in this work with other reported earth-abundant metal oxide-based electrocatalysts in acidic OER.

| Catalyst                                                                    | Electrolyte                          | Overpotential<br>(Current Density) | Reference                                          |
|-----------------------------------------------------------------------------|--------------------------------------|------------------------------------|----------------------------------------------------|
| Ba[Co-POM] with carbon paste                                                | 1 M H <sub>2</sub> SO <sub>4</sub>   | 189 mV (1 mA cm <sup>-2</sup> )    | <i>Nat. Chem.</i> 2018, 30, 24–30.                 |
| CoFeBbO <sub>x</sub> on Pt/Ti electrode <sup>a</sup>                        | 1 M H <sub>2</sub> SO <sub>4</sub>   | 700 mV (500 mA cm <sup>-2</sup> )  | <i>Nat. Catal.</i> 2019, 2, 457–465                |
| γ-MnO <sub>2</sub> on carbon paper                                          | 1 M H <sub>2</sub> SO <sub>4</sub>   | 428 mV (10 mA cm <sup>-2</sup> )   | <i>Angew. Chem. Int. Ed.</i> 2019, 58, 1–6.        |
| Ni <sub>0.5</sub> Mn <sub>0.5</sub> Sb <sub>1.7</sub> O <sub>y</sub> on ATO | 1 M H <sub>2</sub> SO <sub>4</sub>   | 672 mV (10 mA cm <sup>-2</sup> )   | <i>Energy Environ. Sci.</i> , 2017, 10, 2103–2108. |
| Mn <sub>x</sub> Sb <sub>1-x</sub> O <sub>2</sub> on Si                      | 1 M H <sub>2</sub> SO <sub>4</sub>   | 580 mV (50 mA cm <sup>-2</sup> )   | <i>ACS Catal.</i> 2018, 8, 10938–10948.            |
| F-doped Cu <sub>1.5</sub> Mn <sub>1.5</sub> O <sub>4</sub> on glassy carbon | 0.5 M H <sub>2</sub> SO <sub>4</sub> | 330 mV (10 mA cm <sup>-2</sup> )   | <i>Sci. Rep.</i> 2016, 6, 28367.                   |
| Fe-TiO <sub>x</sub> on Ti foam                                              | 0.5 M H <sub>2</sub> SO <sub>4</sub> | 261 mV (1 mA cm <sup>-2</sup> )    | <i>Nano Energy</i> 2018, 45, 118–126.              |
| Ag-doped Co <sub>3</sub> O <sub>4</sub> on glassy carbon                    | 0.5 M H <sub>2</sub> SO <sub>4</sub> | 470 mV (10 mA cm <sup>-2</sup> )   | <i>J. Mater. Chem. A</i> 2018, 6, 5678–5686.       |
| Co <sub>3</sub> O <sub>4</sub> on FTO                                       | 0.5 M H <sub>2</sub> SO <sub>4</sub> | 570 mV (10 mA cm <sup>-2</sup> )   | <i>Chem. Mater.</i> 2017, 29, 950–957.             |
| Co <sub>3</sub> O <sub>4</sub> /CeO <sub>2</sub> on FTO                     | 0.5 M H <sub>2</sub> SO <sub>4</sub> | 423 mV (10 mA cm <sup>-2</sup> )   | This work                                          |
| Co <sub>3</sub> O <sub>4</sub> /CeO <sub>2</sub> on carbon paper            | 0.5 M H <sub>2</sub> SO <sub>4</sub> | 347 mV (10 mA cm <sup>-2</sup> )   | This work                                          |
| Fe <sub>2</sub> O <sub>3</sub> on Ti foil <sup>b</sup>                      | 0.5 M H <sub>2</sub> SO <sub>4</sub> | 650 mV (10 mA cm <sup>-2</sup> )   | <i>J. Catal.</i> 2018, 365, 29–35.                 |
| Co-doped Fe <sub>2</sub> O <sub>3</sub> on Ti foil <sup>b</sup>             | 0.5 M H <sub>2</sub> SO <sub>4</sub> | 650 mV (10 mA cm <sup>-2</sup> )   | <i>Chem. Commun.</i> 2019, 55, 5017–5020.          |
| Hetero-N-Coordinated Co on carbon paper <sup>c</sup>                        | 0.5 M H <sub>2</sub> SO <sub>4</sub> | 256 mV (10 mA cm <sup>-2</sup> )   | <i>ACS Energy Lett.</i> 2019, 4, 1816–1822         |
| N-doped WC on carbon fiber paper <sup>c</sup>                               | 0.5 M H <sub>2</sub> SO <sub>4</sub> | 470 mV (60 mA cm <sup>-2</sup> )   | <i>Nat. Commun.</i> 2018, 9, 924                   |

<sup>a</sup> tested at the 80 °C. <sup>b</sup> Fe<sub>2</sub>O<sub>3</sub> is less stable compared to Co<sub>3</sub>O<sub>4</sub>. <sup>c</sup> Those catalysts are not oxide-based materials.

## References Cited in the Supplementary Information

- 1 Costentin, C., Porter, T. R. & Savéant, J.-M. Conduction and Reactivity in Heterogeneous-Molecular Catalysis: New Insights in Water Oxidation Catalysis by Phosphate Cobalt Oxide Films. *J. Am. Chem. Soc.* **138**, 5615-5622, (2016).
- 2 Zhang, M., de Respinis, M. & Frei, H. Time-resolved observations of water oxidation intermediates on a cobalt oxide nanoparticle catalyst. *Nat. Chem.* **6**, 362-367, (2014).
- 3 Pasquini, C. *et al.* H/D Isotope Effects Reveal Factors Controlling Catalytic Activity in Co-Based Oxides for Water Oxidation. *J. Am. Chem. Soc.* **141**, 2938-2948, (2019).
- 4 Bergmann, A. *et al.* Unified structural motifs of the catalytically active state of Co(oxyhydr)oxides during the electrochemical oxygen evolution reaction. *Nat. Catal.* **1**, 711-719, (2018).
- 5 Moysiadou, A., Lee, S., Hsu, C.-S., Chen, H. M. & Hu, X. Mechanism of Oxygen Evolution Catalyzed by Cobalt Oxyhydroxide: Cobalt Superoxide Species as a Key Intermediate and Dioxygen Release as a Rate-Determining Step. *J. Am. Chem. Soc.* **142**, 11901-11914, (2020).
- 6 Brezesinski, T., Wang, J., Polleux, J., Dunn, B. & Tolbert, S. H. Templated Nanocrystal-Based Porous TiO<sub>2</sub> Films for Next-Generation Electrochemical Capacitors. *J. Am. Chem. Soc.* **131**, 1802-1809, (2009).
- 7 Xiao, J. *et al.* Rational Design of a P2-Type Spherical Layered Oxide Cathode for High-Performance Sodium-Ion Batteries. *ACS Cent. Sci.* **5**, 1937-1945, (2019).
- 8 Shinagawa, T. & Takanabe, K. New Insight into the Hydrogen Evolution Reaction under Buffered Near-Neutral pH Conditions: Enthalpy and Entropy of Activation. *J. Phys. Chem. C* **120**, 24187-24196, (2016).
- 9 Duan, Y. *et al.* Revealing the Impact of Electrolyte Composition for Co-Based Water Oxidation Catalysts by the Study of Reaction Kinetics Parameters. *ACS Catal.* **10**, 4160-4170, (2020).
- 10 Qiu, B. *et al.* CeO<sub>2</sub>-Induced Interfacial Co<sup>2+</sup> Octahedral Sites and Oxygen Vacancies for Water Oxidation. *ACS Catal.* **9**, 6484-6490, (2019).
- 11 Kim, J.-H. *et al.* Enhanced Activity Promoted by CeO<sub>x</sub> on a CoO<sub>x</sub> Electrocatalyst for the Oxygen Evolution Reaction. *ACS Catal.* **8**, 4257-4265, (2018).
- 12 Liu, Y. *et al.* 2D Electron Gas and Oxygen Vacancy Induced High Oxygen Evolution Performances for Advanced Co<sub>3</sub>O<sub>4</sub>/CeO<sub>2</sub> Nanohybrids. *Adv. Mater.* **31**, 1900062, (2019).
- 13 Liu, F. *et al.* Direct Z-Scheme Hetero-phase Junction of Black/Red Phosphorus for Photocatalytic Water Splitting. *Angew. Chem. Int. Ed.* **58**, 11791-11795, (2019).
- 14 Liu, W. *et al.* Single-Site Active Cobalt-Based Photocatalyst with a Long Carrier Lifetime for Spontaneous Overall Water Splitting. *Angew. Chem. Int. Ed.* **56**, 9312-9317, (2017).
- 15 Goldsby, J. Basic Elastic Properties Predictions of Cubic Cerium Oxide Using First-Principles Methods. *J. Ceram.* **2013**, 1-4, (2013).
- 16 Mondschein, J. S. *et al.* Crystalline Cobalt Oxide Films for Sustained Electrocatalytic Oxygen Evolution under Strongly Acidic Conditions. *Chem. Mater.* **29**, 950-957, (2017).
